# Supplementary material for: Systematic review on the outcomes of poller screw augmentation in intramedullary nailing of long bone fracture
Source: PubMed Central journal article supplement — EFORT Open Rev. 2020 Mar 2;5(3):189–203. doi: 10.1302/2058-5241.5.190040 (PMC7144892; doi:10.1302/2058-5241.5.190040), 2020-03-02
Supplement: eor-5-189-s001.pdf [file eor-5-189-s001.pdf]

Appendix 1. Minors Quality Grading of Studies

|                                                         | Ricci | Moongilpatti Sengodan | Krettek | Seyhan 2013 | Seyhan 2012 | Kim | Kulkarni | VanDyke | Seyhan 2011 | Shah | Bhangadiya | Gao | Song |
|---------------------------------------------------------|-------|-----------------------|---------|-------------|-------------|-----|----------|---------|-------------|------|------------|-----|------|
| 1. A clearly stated aim                                 | 1     | 2                     | 2       | 1           | 2           | 2   | 2        | 2       | 2           | 2    | 2          | 1   | 2    |
| 2. Inclusion of consecutive patients                    | 2     | 2                     | 0       | 0           | 0           | 0   | 0        | 0       | 0           | 0    | 0          | 0   | 0    |
| 3. Prospective collection of data                       | 0     | 2                     | 2       | 0           | 0           | 0   | 0        | 0       | 0           | 0    | 0          | 0   | 0    |
| 4. Endpoints appropriate to the aim of the study        | 2     | 2                     | 2       | 2           | 2           | 2   | 2        | 2       | 2           | 2    | 2          | 2   | 2    |
| 5. Unbiased assessment of the study endpoint            | 2     | 1                     | 2       | 2           | 2           | 2   | 2        | 2       | 2           | 1    | 2          | 2   | 2    |
| 6. Follow-up period appropriate to the aim of the study | 2     | 2                     | 2       | 2           | 2           | 2   | 2        | 2       | 2           | 2    | 2          | 2   | 2    |
| 7. Loss to follow up less than 5%                       | 1     | 2                     | 1       | 2           | 2           | 2   | 2        | 2       | 2           | 2    | 2          | 2   | 2    |
| *8. Prospective calculation of the study size           | 0     | 0                     | 0       | 0           | 0           | 0   | 0        | 2       | 0           | 0    | 0          | 0   | 0    |
| *9. An adequate control group                           |       |                       |         |             |             |     |          | 2       | 1           |      |            |     | 2    |
| 10. Contemporary groups                                 |       |                       |         |             |             |     |          | 1       | 1           |      |            |     | 1    |
| *11. Baseline equivalence of groups                     |       |                       |         |             |             |     |          | 1       | 1           |      |            |     | 1    |
| *12. Adequate statistical analyses                      |       |                       |         |             |             |     |          | 2       | 2           |      |            |     | 2    |
| Total                                                   | 10    | 13                    | 11      | 9           | 10          | 10  | 10       | 18      | 15          | 9    | 10         | 9   | 16   |

\*Additional criteria in the case of comparative studies.

Supplementary Figures

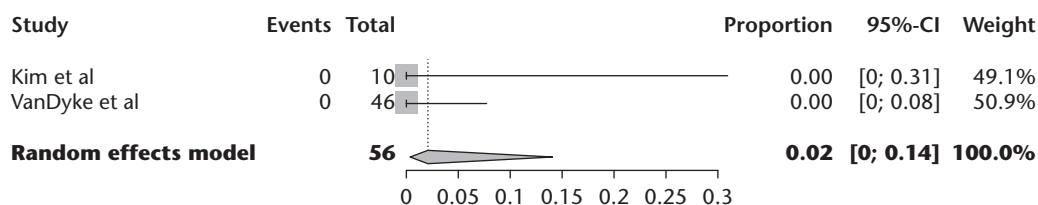

Fig. S1 Overall outcome proportion of malalignment in femoral studies.

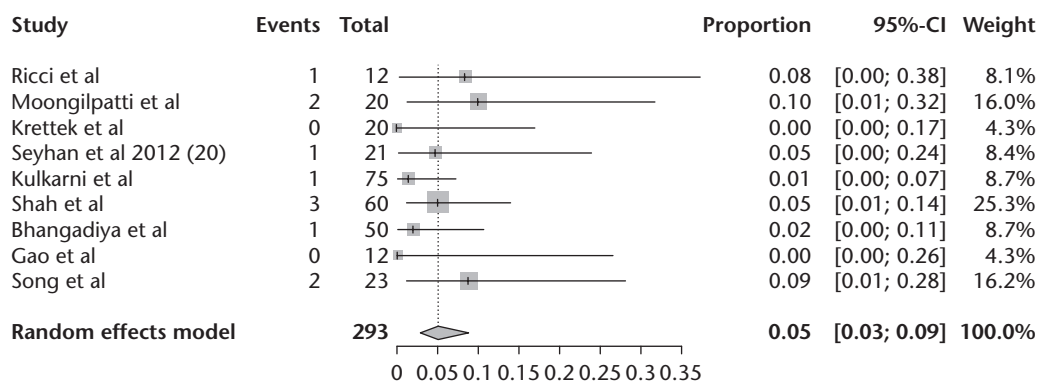

Fig. S2 Overall outcome proportion of malalignment in tibial studies.

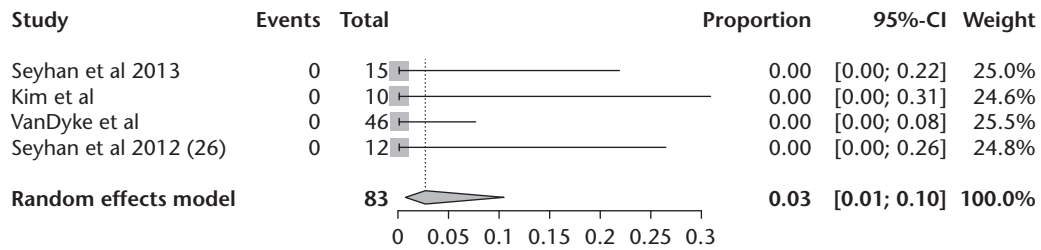

Fig. S3 Overall outcome proportion of nonunion in femoral studies.

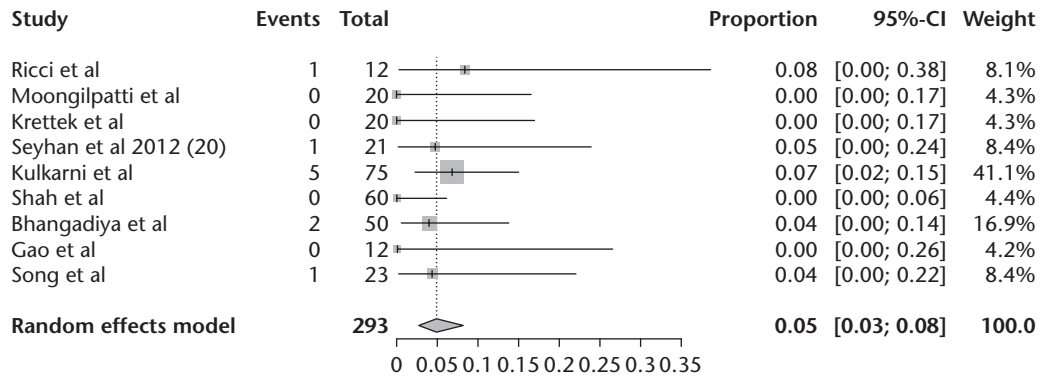

Fig. S4 Overall outcome proportion of nonunion in tibial studies.

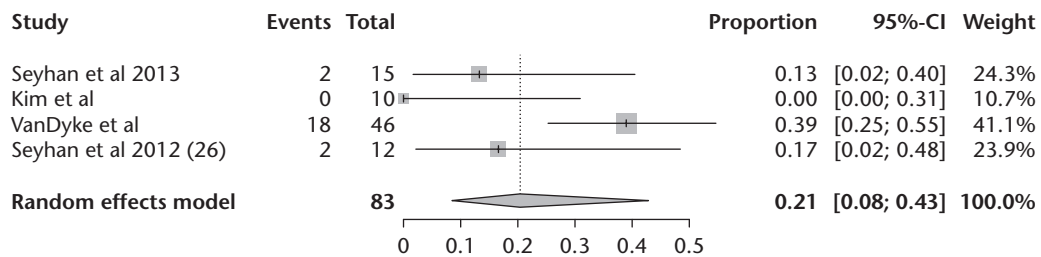

Fig. S5 Overall outcome proportion of secondary procedures in femoral studies.

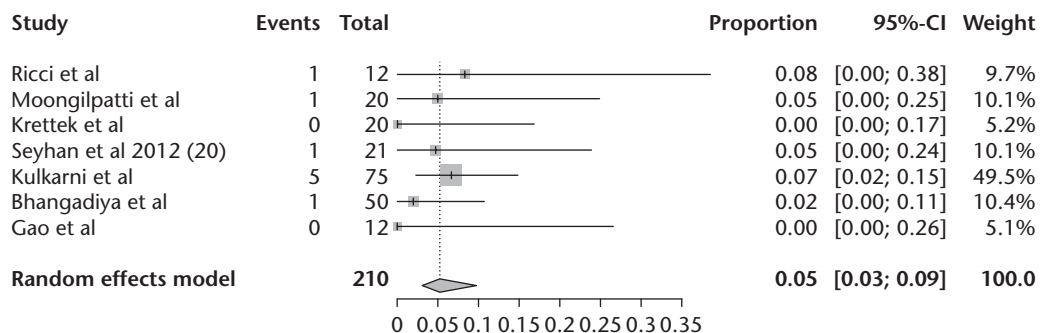

Fig. S6 Overall outcome proportion of secondary procedures in tibial studies.

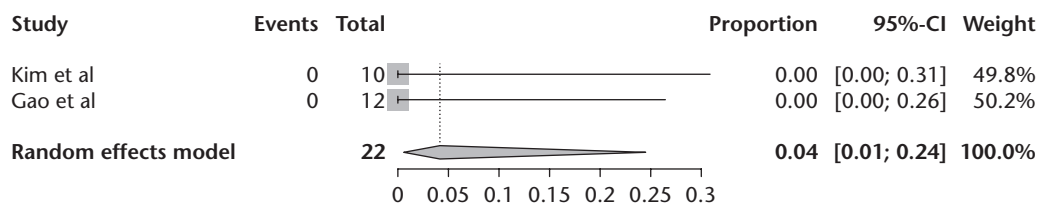

Fig. S7 Overall outcome proportion of malalignment in nonunion studies.

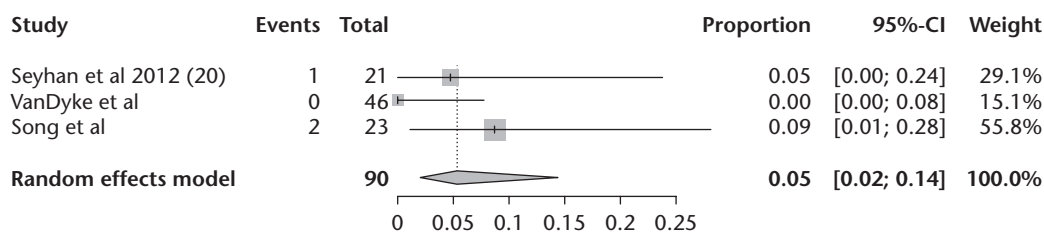

Fig. S8 Overall outcome proportion of malalignment in acute fracture studies.

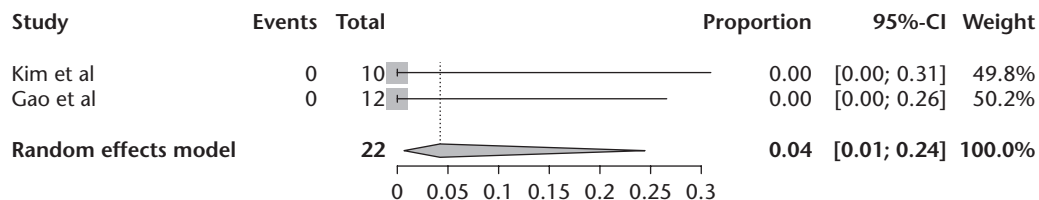

Fig. S9 Overall outcome proportion of secondary procedures in nonunion studies.

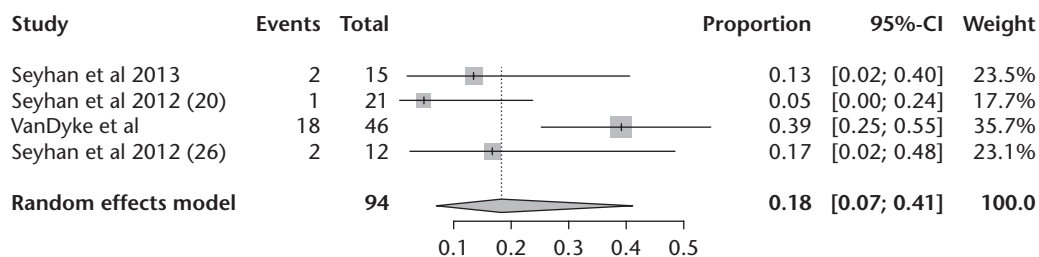

Fig. S10 Overall outcome proportion of secondary procedures in acute fracture studies.
